# Supplementary material for: Daytime Variation of Chloral Hydrate-Associated Sedation Outcomes: A Propensity-Matched Cohort Study
Source: MDPI journal article supplement (doi:10.3390/jcm12031245), 2023-02-03
Supplement: s1 [file s1]

**Supplementary Table S1.** The demographic characteristics and time of day distributions in the excluded and eligible records.

|                           | Excluded records (n = 5638) | Eligible records (n = 41,831) | <i>p</i> -Values |
|---------------------------|-----------------------------|-------------------------------|------------------|
| Age, months, median (IQR) | 14.2 (6.0, 31.3)            | 14.2 (4.9, 30.3)              | 0.19             |
| Male, n (%)               | 3506 (62.2)                 | 25081 (60.0)                  | <0.01*           |
| Weight, kg, median (IQR)  | 10.0 (7.0, 13.0)            | 10.0 (7.0, 13.0)              | 0.20             |
| Type of patients, n (%)   |                             |                               | 0.84             |
| Outpatient                | 3602 (63.9)                 | 26785 (64.0)                  |                  |
| Inpatient                 | 2036 (36.1)                 | 15046(36.0)                   |                  |
| Procedures, n (%)         |                             |                               | 0.60             |
| Cardiac ultrasound        | 1212 (21.5)                 | 8955 (21.4)                   |                  |
| CT                        | 460 (8.2)                   | 3619 (8.7)                    |                  |
| Lung function             | 1597 (28.3)                 | 11401 (27.3)                  |                  |
| MRI                       | 1123 (19.9)                 | 8338 (19.9)                   |                  |
| Hearing screen            | 1003 (17.8)                 | 7691 (18.4)                   |                  |
| VAEP                      | 79 (1.4)                    | 603 (1.4)                     |                  |
| Others                    | 164 (2.9)                   | 1224 (2.9)                    |                  |
| Cohorts                   |                             |                               | 0.93             |
| Morning cases, n (%)      | 3613 (64.1)                 | 26779 (64.0)                  |                  |
| Afternoon cases, n (%)    | 2025 (35.9)                 | 15051 (36.0)                  |                  |

**Note:** CT (computed tomography), MRI (magnetic resonance imaging), VAEP (visual and auditory evoked potential); \*  $p < 0.05$
